# Supplementary material for: SARS-CoV-2 infection causes dopaminergic neuron senescence
Source: PubMed Central journal article supplement (PMC10843182; doi:10.1016/j.stem.2023.12.012), 2024-02-01
Supplement: mmc1.pdf [file mmc1.pdf]

**Supplemental Information**

**SARS-CoV-2 infection causes dopaminergic**

**neuron senescence**

**Liuliu Yang, Tae Wan Kim, Yuling Han, Manoj S. Nair, Oliver Harschnitz, Jiajun Zhu, Pengfei Wang, So Yeon Koo, Laretta A. Lacko, Vasuretha Chandar, Yaron Bram, Tuo Zhang, Wei Zhang, Feng He, Chendong Pan, Junjie Wu, Yaoxing Huang, Todd Evans, Paul van der Valk, Maarten J. Titulaer, Jochem K.H. Spoor, Robert L. Furler O'Brien, Marianna Bugiani, Wilma D.J. Van de Berg, Robert E. Schwartz, David D. Ho, Lorenz Studer, and Shuibing Chen**

Figure S1

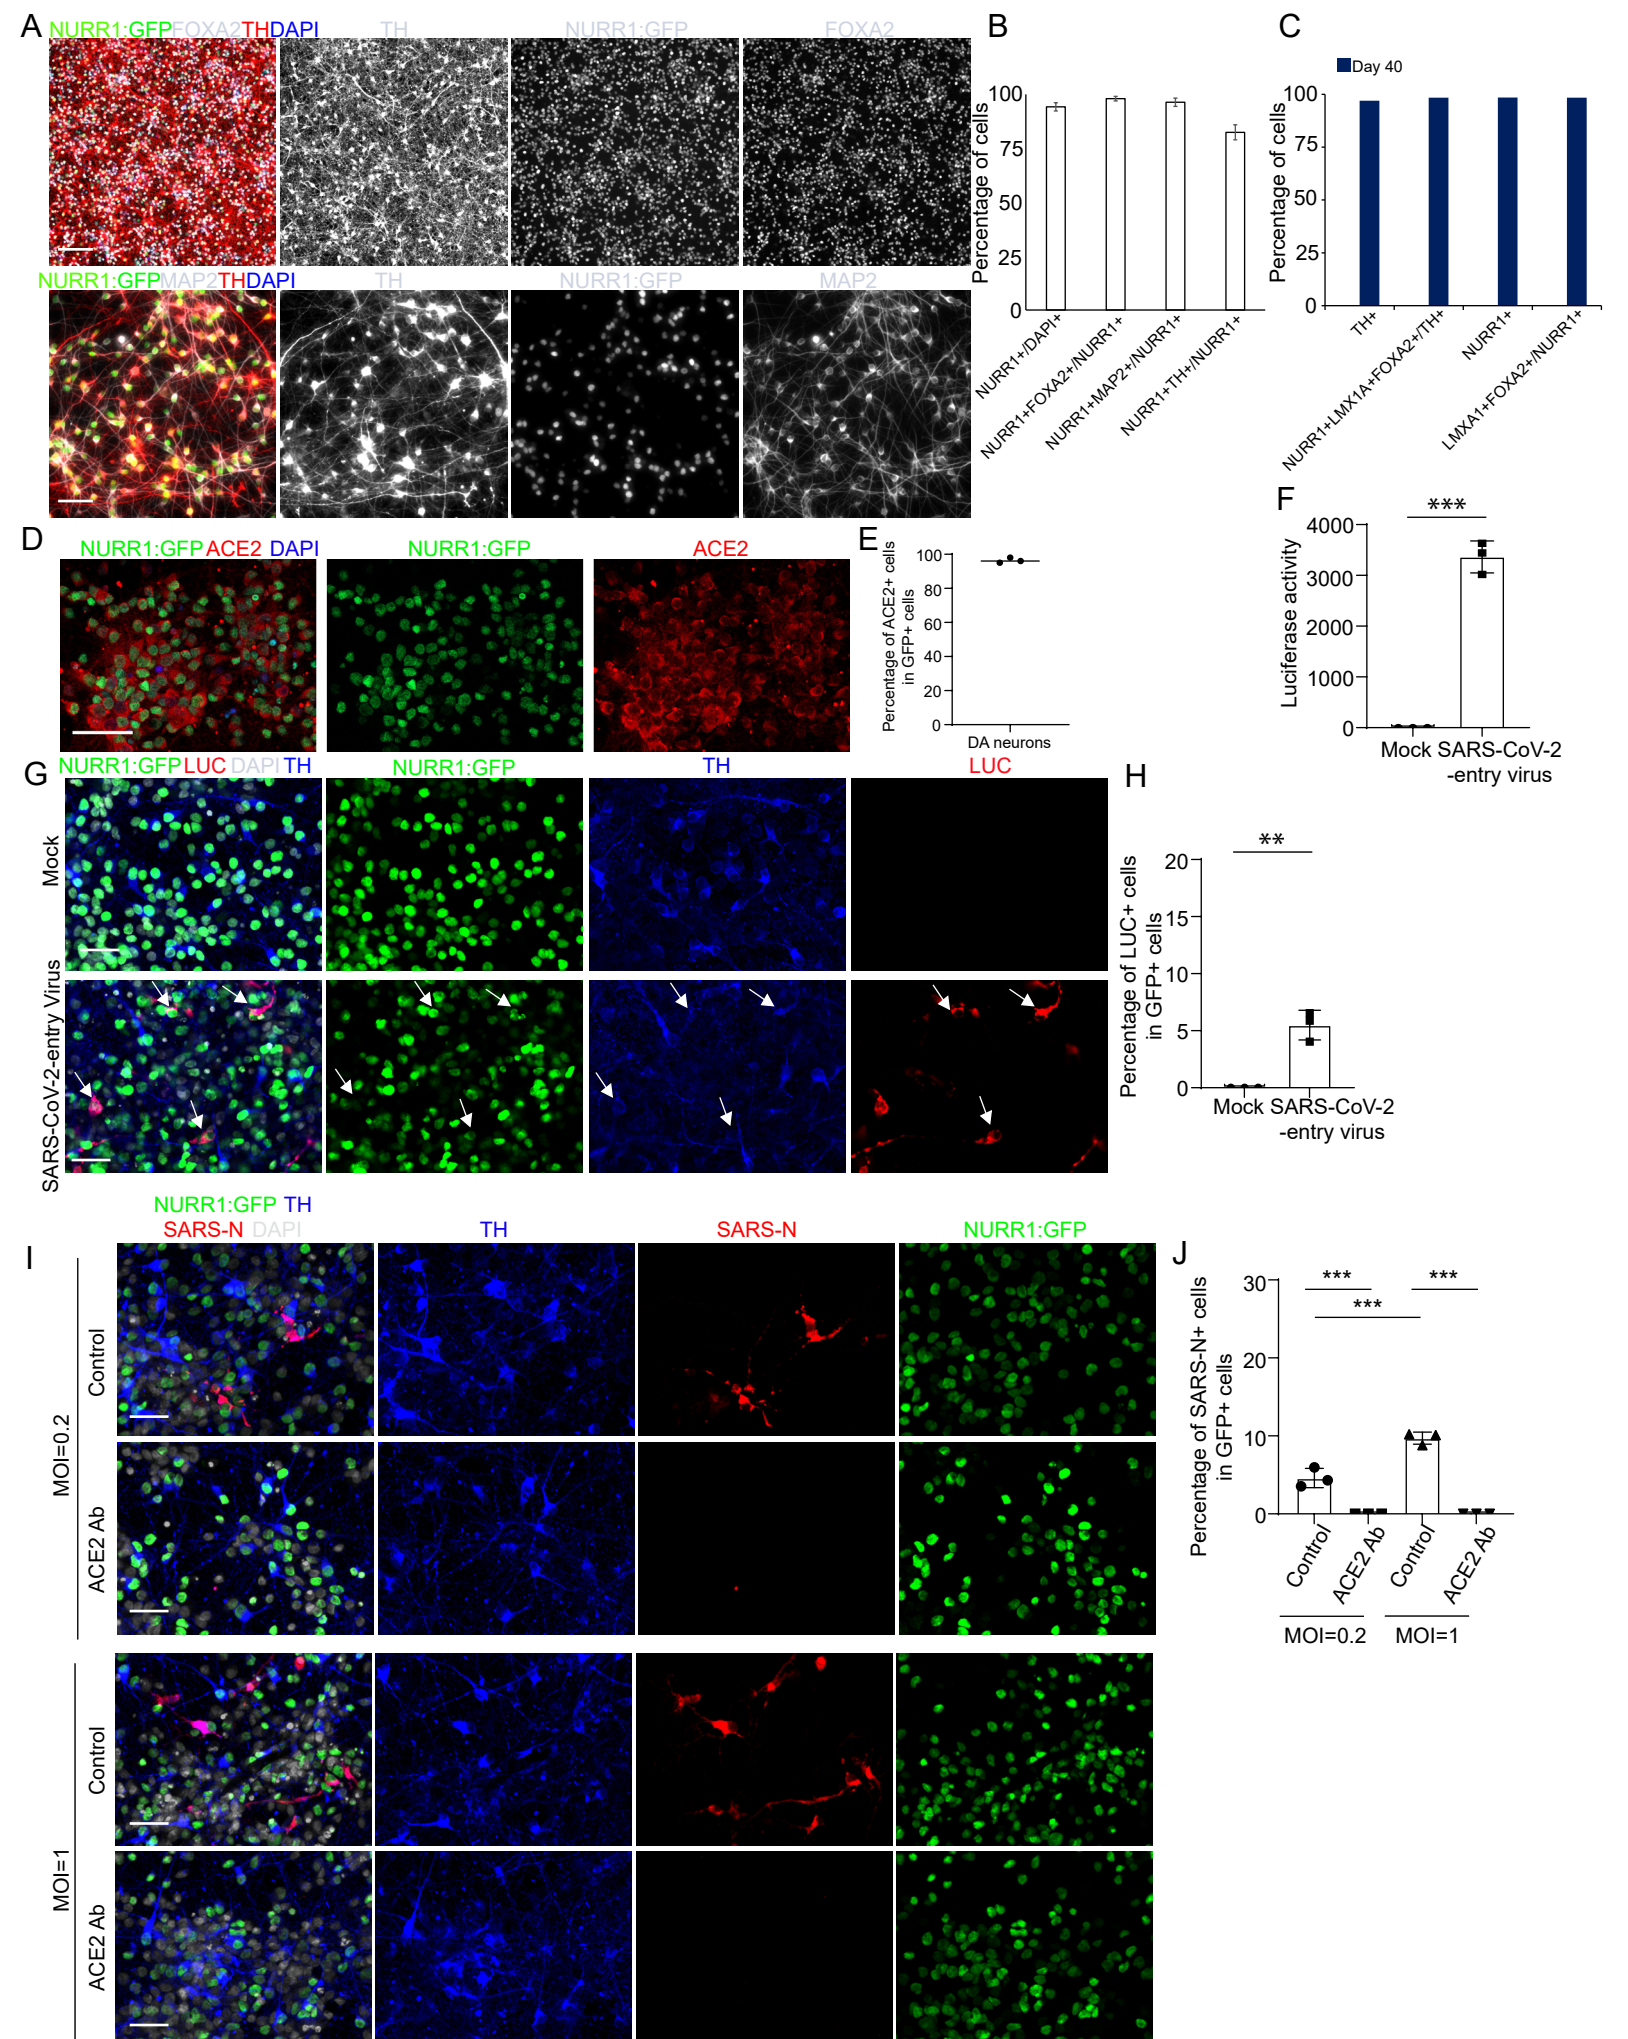

## SUPPLEMENTAL INFORMATION

### Figure S1. Characterization of hPSC-derived DA neurons. Related to Figure 1.

**(A and B)** Representative confocal images (A) and quantification (B) of NURR1: GFP H9-derived DA neurons stained with antibodies recognizing NURR1-GFP, TH, MAP2 or FOXA2. Scale bar=100  $\mu\text{m}$  (upper panel) and 50 $\mu\text{m}$  (lower panel). n=3 independently biological replicates.

**(C)** Single cell RT-qPCR analysis of DA neuron marker genes from FACS based NURR1-GFP<sup>+</sup> purified cells at day40 (67 cells) from previous study <sup>1</sup>.

**(D and E)** Representative confocal images (D) and quantification of ACE2<sup>+</sup> cells in NURR1-GFP<sup>+</sup> cells (E) of purified NURR1: GFP-derived DA neurons stained with ACE2 antibody. Scale bar=50  $\mu\text{m}$ . n=3 independent biological replicates.

**(F)** Luciferase activity in lysates from purified NURR1: GFP-derived DA neurons at 24 hpi following exposure to SARS-CoV-2-entry virus at MOI=0.01. The Y-axis indicates the absolute luciferase activity between mock and infect groups. n=3 independent biological replicates.

**(G and H)** Representative confocal images (G) and quantification (H) of purified NURR1: GFP-derived DA neurons infected with SARS-CoV-2-entry virus (MOI=0.01) at 24 hpi using antibodies against luciferase and DA neuron markers. Scale bar=50  $\mu\text{m}$ . n=3 independent biological replicates.

**(I and J)** Representative confocal images (I) and quantification (J) of purified NURR1: GFP-derived DA neurons infected with SARS-CoV-2 virus at different MOI (MOI=0.2 or MOI=1) and treated with ACE2 blocking antibody at 72 hpi using antibodies against SARS-N and DA neuron markers. Scale bar=50  $\mu\text{m}$ . n=3 independent biological replicates.

Data was presented as mean  $\pm$  STDEV. *P* values were calculated by unpaired two-tailed Student's *t* test. \*\**P* < 0.01, \*\*\**P* < 0.001.

Figure S2

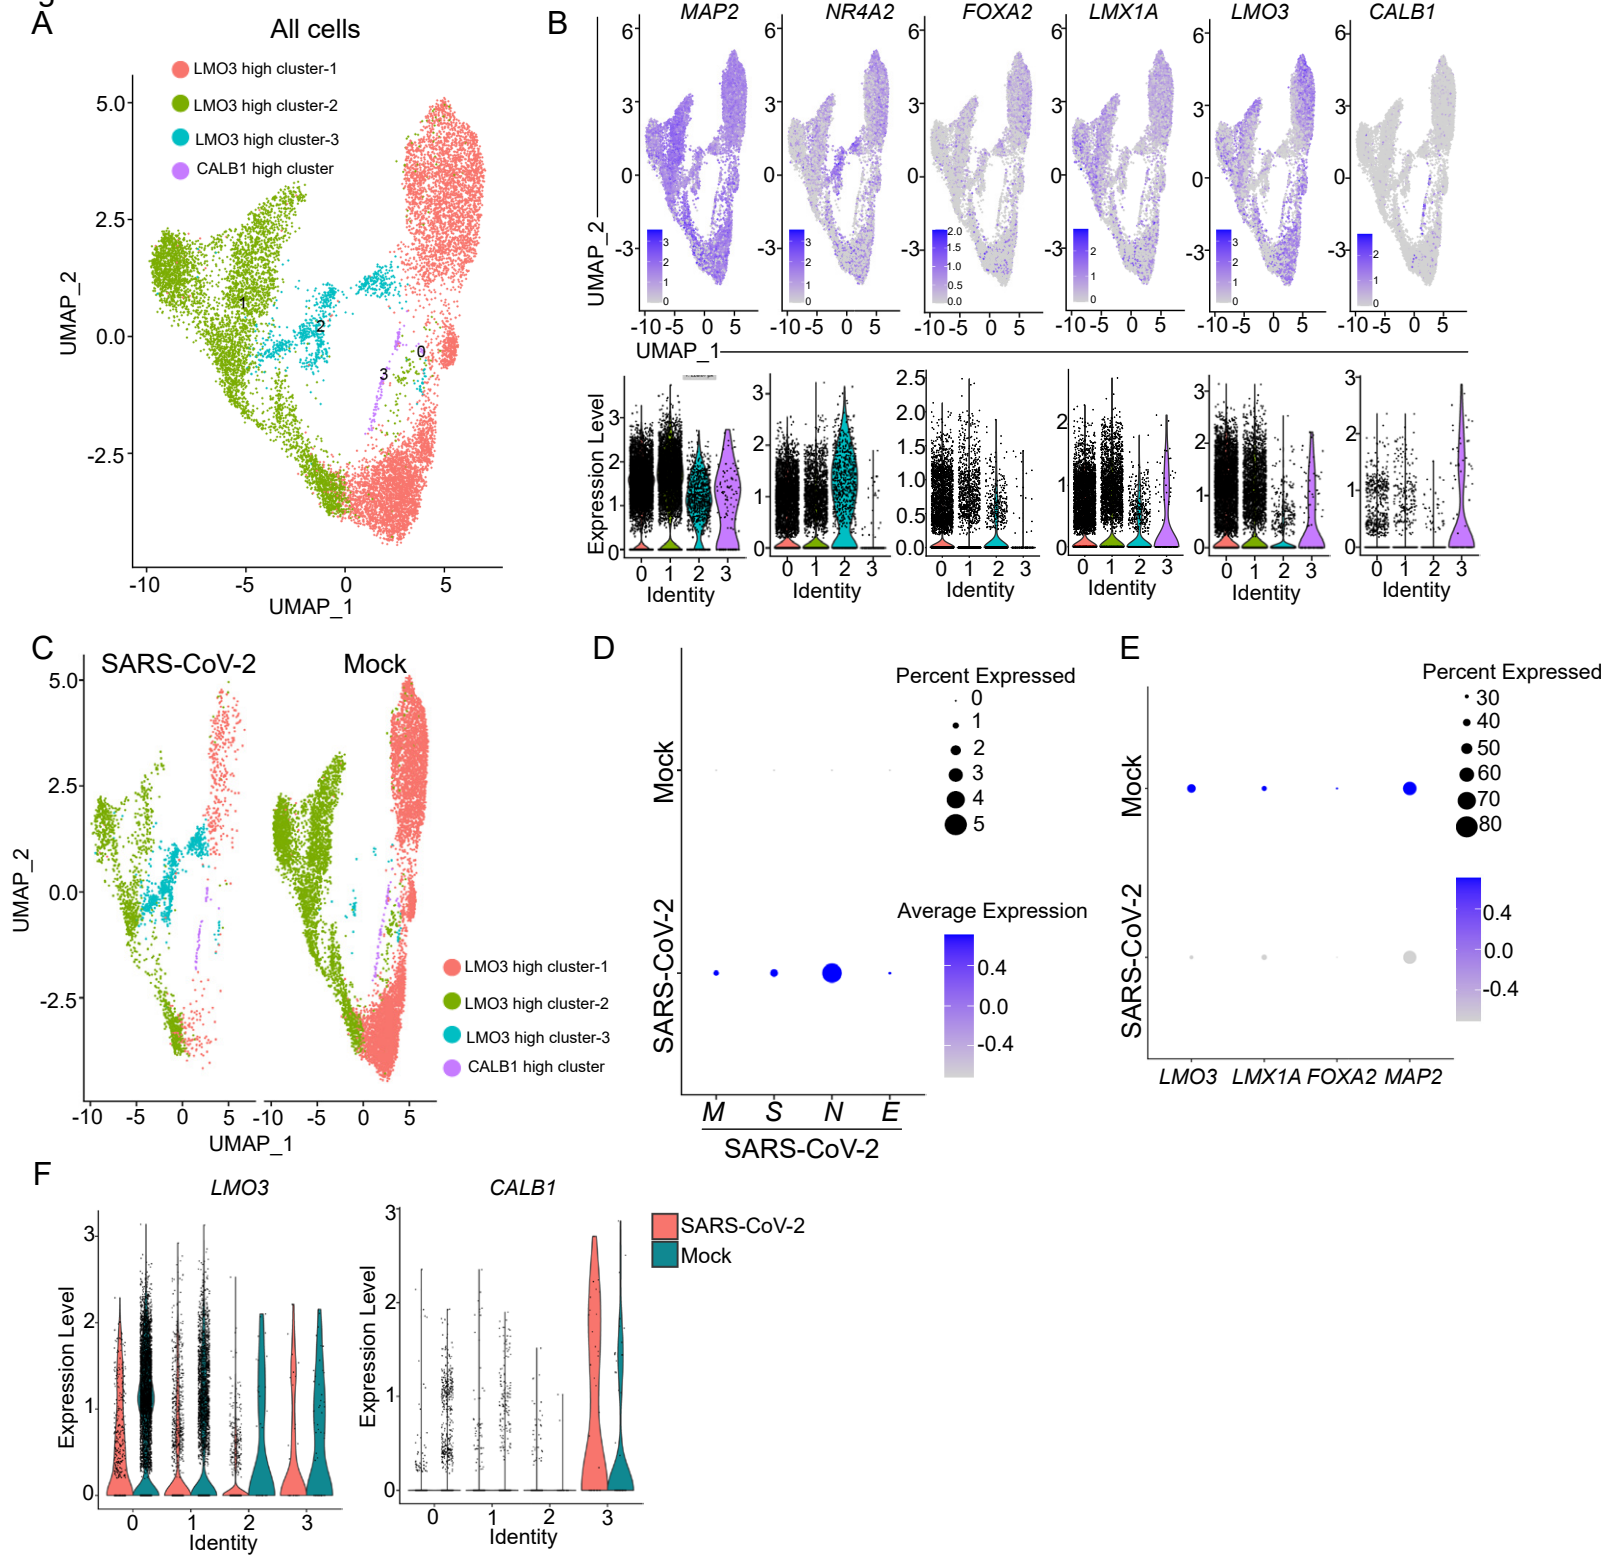

**Figure S2. hPSC-derived DA neurons are susceptible and permissive to SARS-CoV-2 infection. Related to Figure 2.**

**(A)** UMAP analysis of the mock and SARS-CoV-2 infected purified NURR1: GFP-DA neurons at 48 hpi (MOI=0.2).

**(B)** UMAP and violin plot analysis of DA neuron marker genes.

**(C)** UMAP analysis of the mock and SARS-CoV-2 infected purified NURR1: GFP-DA neurons at 48 hpi (MOI=0.2).

**(D)** Dot plot analysis of SARS-CoV-2 viral transcripts in the mock and SARS-CoV-2 infected purified NURR1: GFP-DA neurons at 48 hpi (MOI=0.2).

**(E)** Dot plot analysis of expression levels of DA neuron marker genes in the mock and SARS-CoV-2 infected purified NURR1: GFP-DA neurons at 48 hpi (MOI=0.2).

**(F)** Violin plot analysis of expression levels of DA neuron marker genes in different populations of the mock and SARS-CoV-2 infected purified NURR1: GFP-DA neurons at 48 hpi (MOI=0.2).

Figure S3

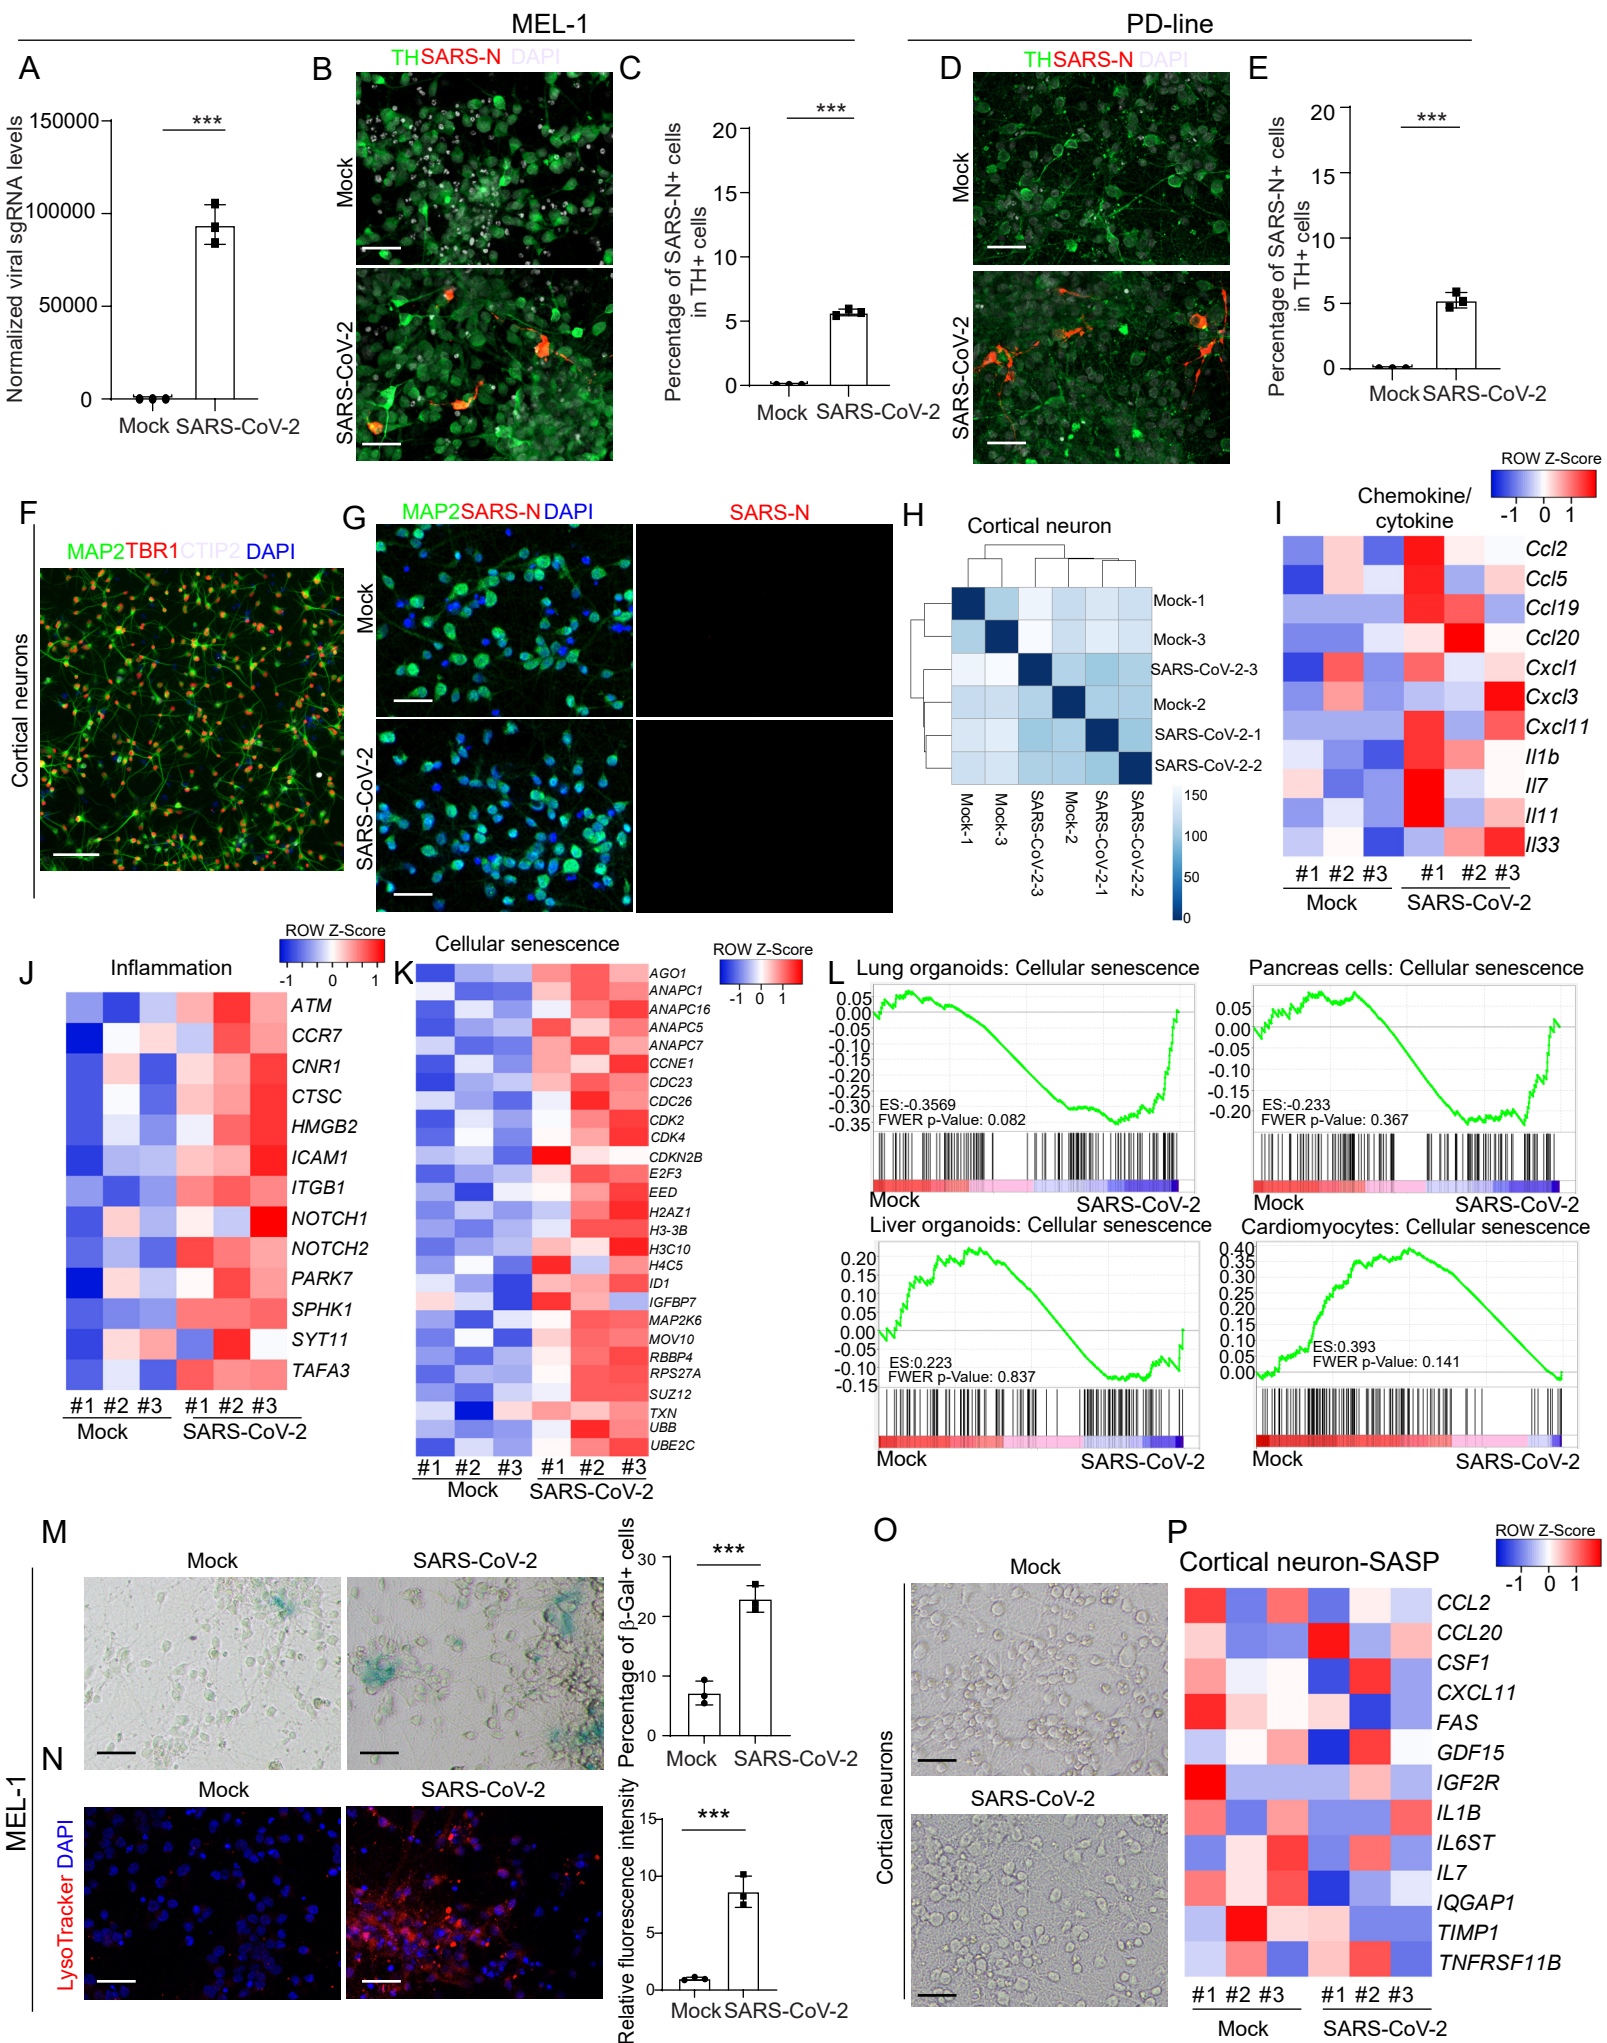

**Figure S3. SARS-CoV-2 infection of hPSC-derived DA neurons triggered senescence phenotype. Related to Figure 1 and Figure 3.**

**(A)** RT-qPCR analysis of total RNA extracted from MEL1-derived DA neurons at 48 hpi of SARS-CoV-2 infection (MOI=0.2) for viral N sgRNA. The graph depicts the mean sgRNA level normalized to ACTB. n=3 independent biological replicates.

**(B and C)** Representative confocal images (B) and quantification of the percentage of SARS-N<sup>+</sup> cells in TH<sup>+</sup> cells (C) of MEL1-DA neurons infected with SARS-CoV-2 (MOI=0.1) at 72 hpi using antibodies against SARS-CoV-2 Nucleocapsid protein (SARS-N) and marker for DA neurons. Scale bar=50µm. n=3 independent biological replicates.

**(D and E)** Representative confocal images (D) and quantification of the percentage of SARS-N<sup>+</sup> cells in TH<sup>+</sup> cells (E) of SNCA PD line-2copy-DA neurons infected with SARS-CoV-2 (MOI=0.1) at 72 hpi using antibodies against SARS-CoV-2 Nucleocapsid protein (SARS-N) and marker for DA neurons. Scale bar=50 µm. n=3 independent biological replicates. N=3 independent biological replicates.

**(F)** Representative confocal images of H9-cortical neurons using antibodies against MAP2, TBR1, and CTIP2. Scale bar=100 µm. n=3 independent biological replicates.

**(G)** Representative confocal images of H9-cortical neurons infected with SARS-CoV-2 (MOI=0.1) at 72 hpi using antibodies against SARS-CoV-2 Nucleocapsid protein (SARS-N) and MAP2. Scale bar=50µm. n=3 independent biological replicates.

**(H)** Clustering analysis of the mock or SARS-CoV-2 infected H9-derived cortical neurons at 48 hpi (MOI=0.2).

**(I and J)** Heatmap of chemokine/cytokines (I) and inflammation associated genes (J) in the mock or SARS-CoV-2 infected NURR1: GFP H9-derived DA neurons at 48 hpi (MOI=0.2).

**(K)** Heatmap of senescence associated genes in the mock or SARS-CoV-2 infected NURR1: GFP H9-derived DA neurons at 48 hpi (MOI=0.2).

**(L)** Gene set enrichment analysis (GSEA) of cellular senescence pathway in the mock or SARS-CoV-2 infected hPSC-derived lung organoids (GSE155241), pancreas cells (GSE151803), liver organoids (GSE151803) and cardiomyocytes (GSE151880).

**(M)** β-Gal staining and quantification of the mock or SARS-CoV-2 infected MEL1-derived DA neurons at 72 hpi (MOI=0.1). Scale bar=75µm. n=3 independent biological replicates.

**(N)** Representative confocal images and quantification of MEL1-DA neurons infected with the mock or SARS-CoV-2 (MOI=0.1) at 72 hpi using LysoTracker. Scale bar=50µm. n=3 independent biological replicates.

**(O)** β-Gal staining and quantification of the mock or SARS-CoV-2 infected H9-derived cortical neurons at 72 hpi (MOI=0.1). Scale bar=75µm. n=3 independent biological replicates.

**(P)** Heatmap of SASP associated genes in the mock or SARS-CoV-2 infected H9-derived cortical neurons at 48 hpi (MOI=0.2).

Data was presented as mean ± STDEV. *P* values were calculated by unpaired two-tailed Student's *t* test. \**P* < 0.05, \*\**P* < 0.01, and \*\*\**P* < 0.001.

Figure S4

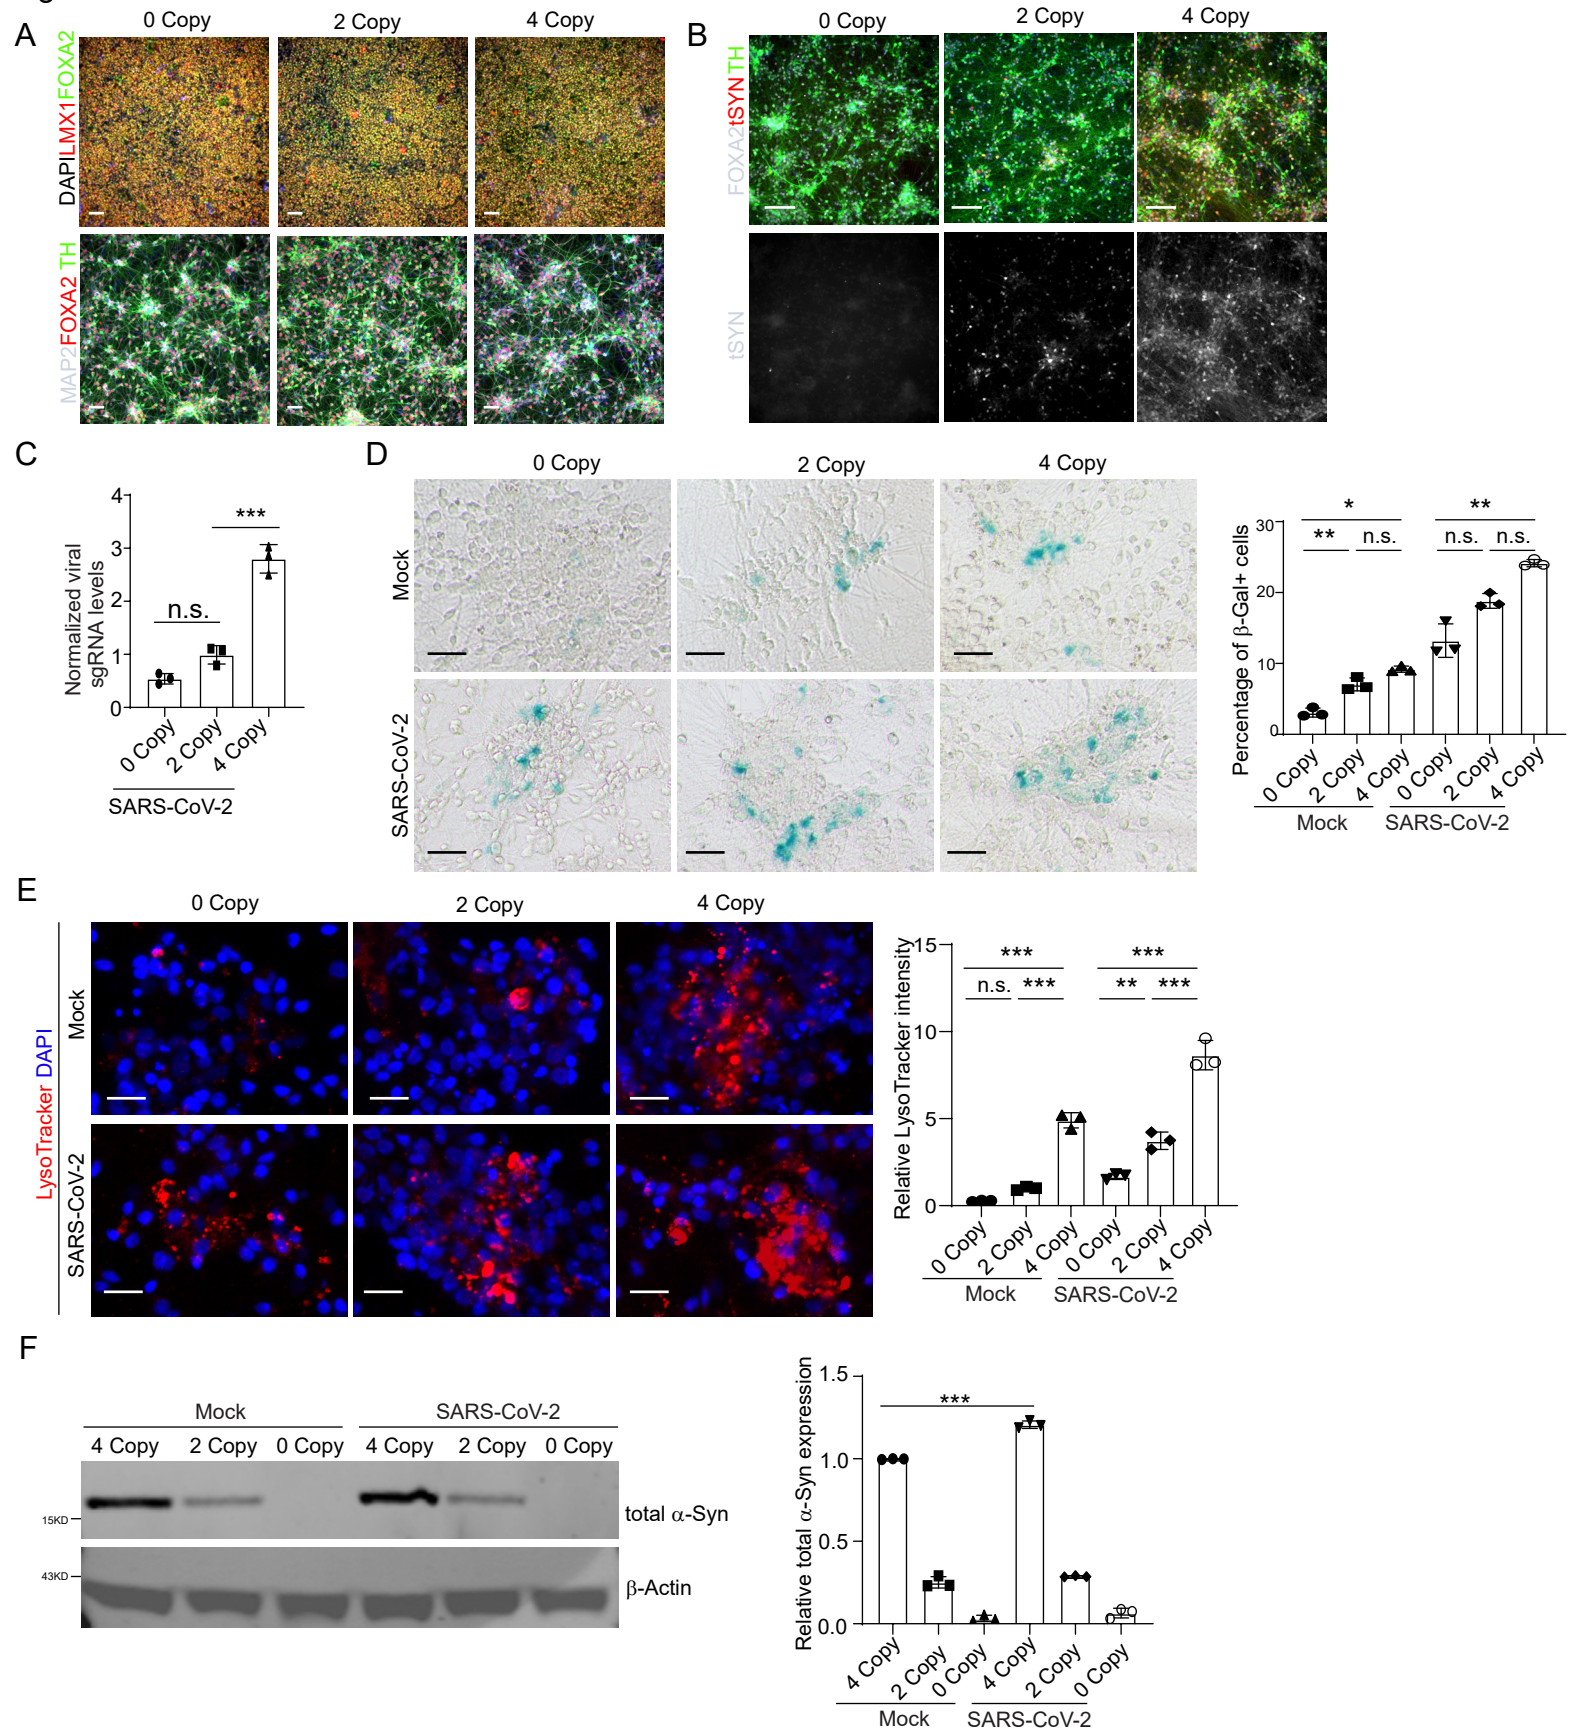



**Figure S4. SARS-CoV-2 infection on SNCA 0 copy, 2 copy and 4 copy PD-iPSC-derived DA neurons. Related to Figure 3.**

(A) Representative confocal images of *SNCA* lines-derived DA neurons at day 20 (upper) and day 45 (lower) using antibodies against markers for DA neurons. Scale bar=50  $\mu$ m. n=3 independent biological replicates.

(B) Representative confocal images of *SNCA* lines-derived DA neurons at day 45 using antibodies against total  $\alpha$ -Syn and markers for DA neurons. Scale bar=50  $\mu$ m. n=3 independent biological replicates.

(C) qRT-PCR analysis of total RNA extracted from *SNCA* lines-derived DA neurons at 48 hpi of SARS-CoV-2 infection (MOI=0.2) for viral N sgRNA. The graph depicts the mean sgRNA level normalized to *ACTB*. n=3 independent biological replicates.

(D)  $\beta$ -Gal staining and quantification of the mock or SARS-CoV-2 infected *SNCA* lines-derived DA neurons at 72 hpi (MOI=0.1). Scale bar=75 $\mu$ m. n=3 independent biological replicates.

(E) Representative confocal images and quantification of *SNCA* lines-derived DA neurons infected with the mock or SARS-CoV-2 (MOI=0.1) at 72 hpi stained with LysoTracker. Scale bar=50  $\mu$ m. n=3 independent biological replicates.

(F) Western blot analysis and quantification of senescence related proteins of total  $\alpha$ -Syn in mock or SARS-CoV-2 infected *SNCA* lines-derived DA neurons at 48 hpi (MOI=0.2). n=3 independent biological replicates.

Data was presented as mean  $\pm$  STDEV. *P* values were calculated by unpaired two-tailed Student's t test. n.s. no significance, \**P* < 0.05, \*\**P* < 0.01, and \*\*\**P* < 0.001.

Figure S5

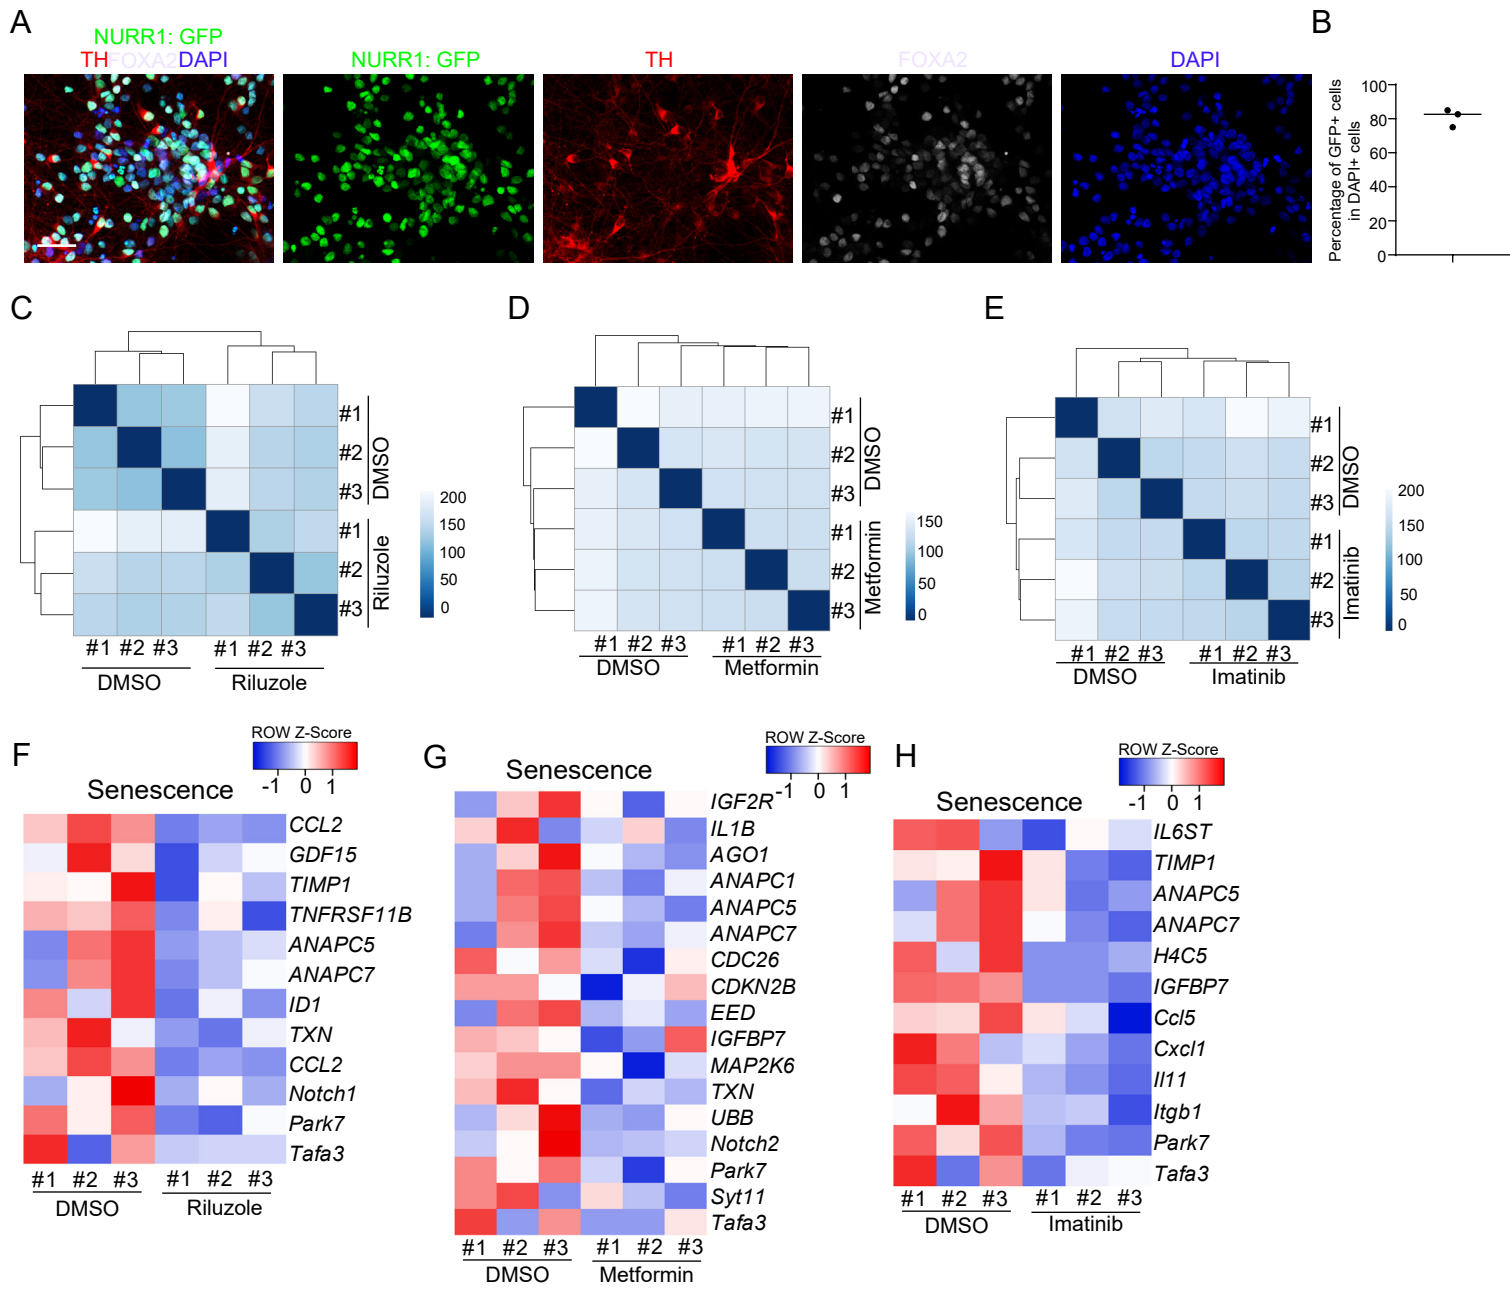

**Figure S5. Three drug candidates rescue senescence phenotype of SARS-CoV-2 infected hPSC-derived DA neurons. Related to Figure 4.**

**(A and B)** Representative confocal images (A) and quantification of the percentage of NURR1-GFP<sup>+</sup> cells (B) of NURR1: GFP H9 lines-derived DA neurons for drug screening. Scale bar=50  $\mu$ m. n=3 independent biological replicates. Data was presented as mean  $\pm$  STDEV.

**(C-E)** Clustering analysis of gene expression profiles of DMSO or drug candidate-treated purified hPSC-derived DA neurons at 48 hpi upon SARS-CoV-2 infection (MOI=0.1).

**(F-H)** Heatmap of SASP associated genes of DMSO or drug candidate-treated purified hPSC-derived DA neurons at 48 hpi upon SARS-CoV-2 infection (MOI=0.1).

Figure S6

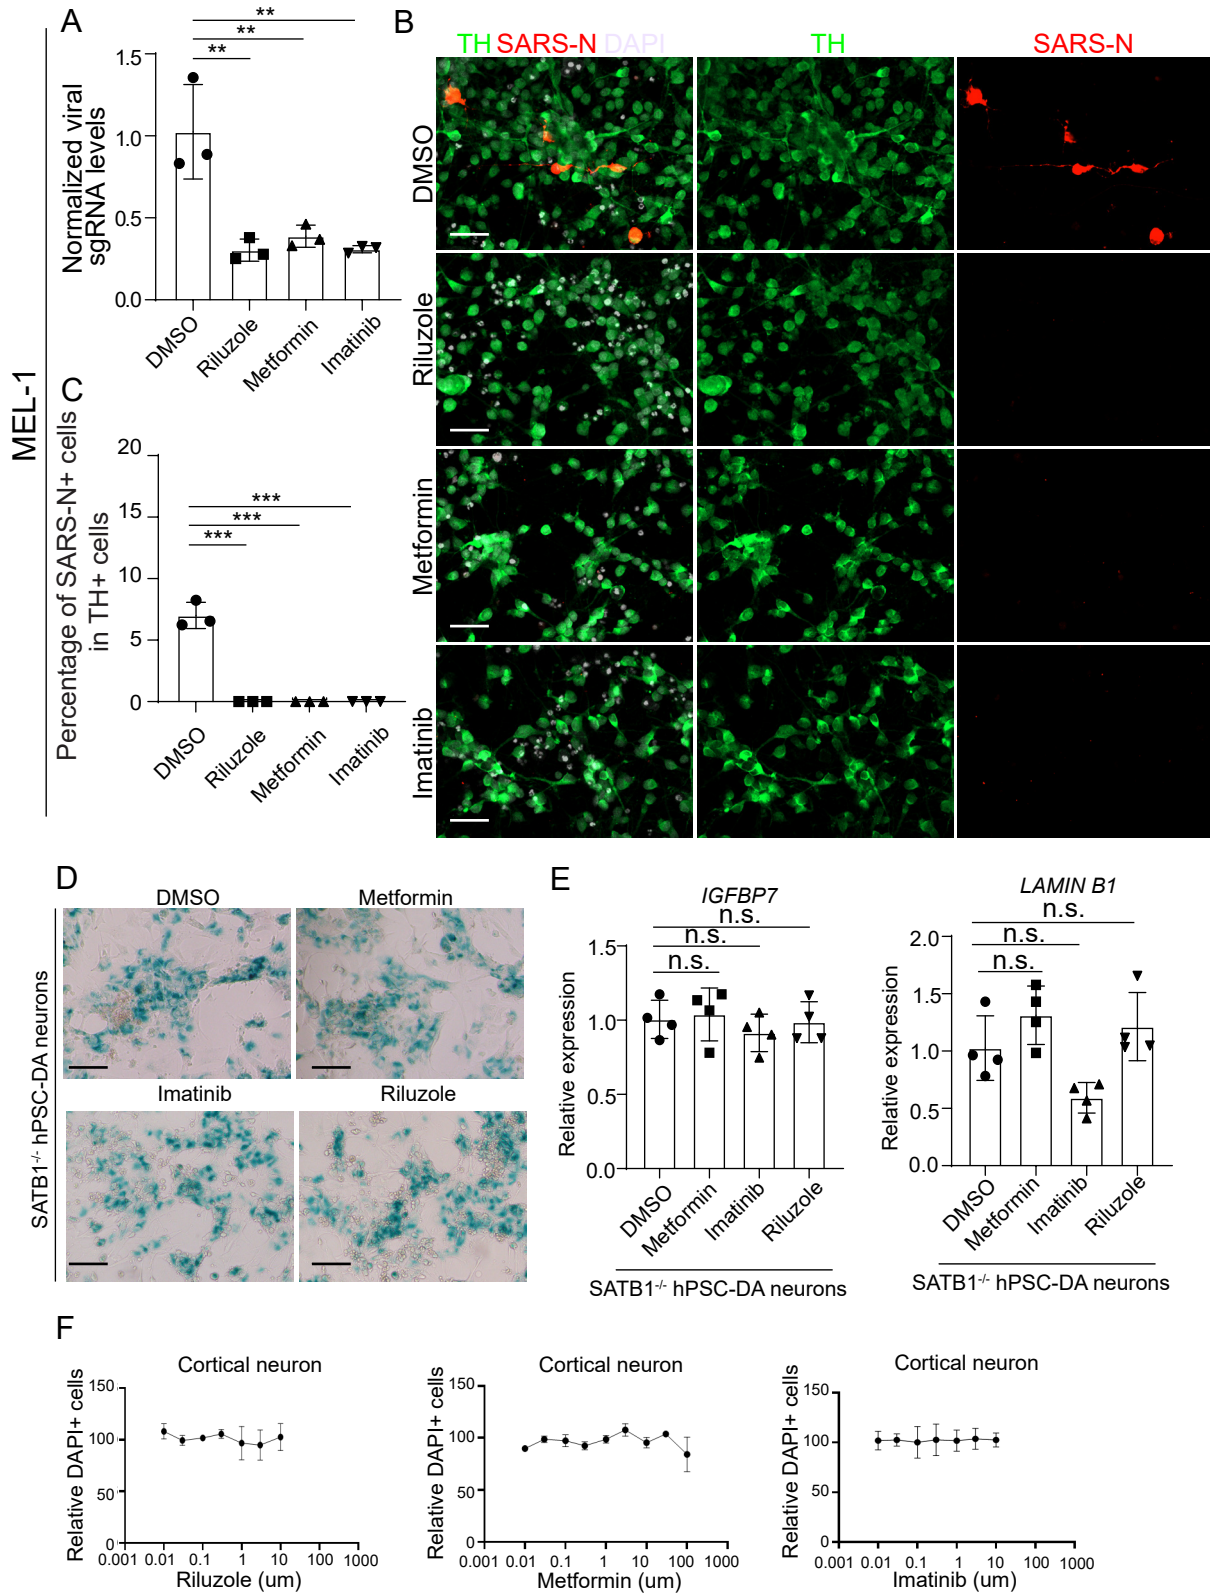

**Figure S6. Three drug candidates block SARS-CoV-2 infection of hPSC-derived DA neurons. Related to Figure 5 and Figure 6.**

**(A)** RT-qPCR analysis of total RNA extracted from DMSO or drug candidates-pre-treated MEL1-derived DA neurons following SARS-CoV-2 infection (MOI=0.2) for viral N sgRNA at 48 hpi. The graph depicts the mean sgRNA level normalized to *ACTB*. n=3 independent biological replicates.

**(B and C)** Representative confocal images (B) and quantification of the percentage of SARS-N<sup>+</sup> cells in TH<sup>+</sup> cells (C) of DMSO or drug candidates-pre-treated MEL1-DA neurons following SARS-CoV-2 infection (MOI=0.2) at 72 hpi using antibodies against SARS-CoV-2 Nucleocapsid protein (SARS-N) and marker for DA neurons. Scale bar=50 μm. n=3 independent biological replicates.

**(D)** β-Gal staining and quantification of DMSO or drug candidates-treated *SATBI*<sup>-/-</sup> hPSC-derived DA neurons at 72 hpi (MOI=0.1). Scale bar=75μm. n=3 independent biological replicates.

**(E)** RT-qPCR analysis of senescence related genes of *IGFBP7* and *LAMIN B1* in DMSO or drug candidates-treated *SATBI*<sup>-/-</sup> hPSC-derived DA neurons at 48 hpi (MOI=0.2). n=3 independent biological replicates.

**(F)** Cytotoxicity curves of riluzole, metformin and imatinib in H9-derived cortical neurons. n=3 independent biological replicates.

Data was presented as mean ± STDEV. *P* values were calculated by unpaired two-tailed Student's t test. n.s. no significance, \*\**P* < 0.01, and \*\*\**P* < 0.001.

Figure S7

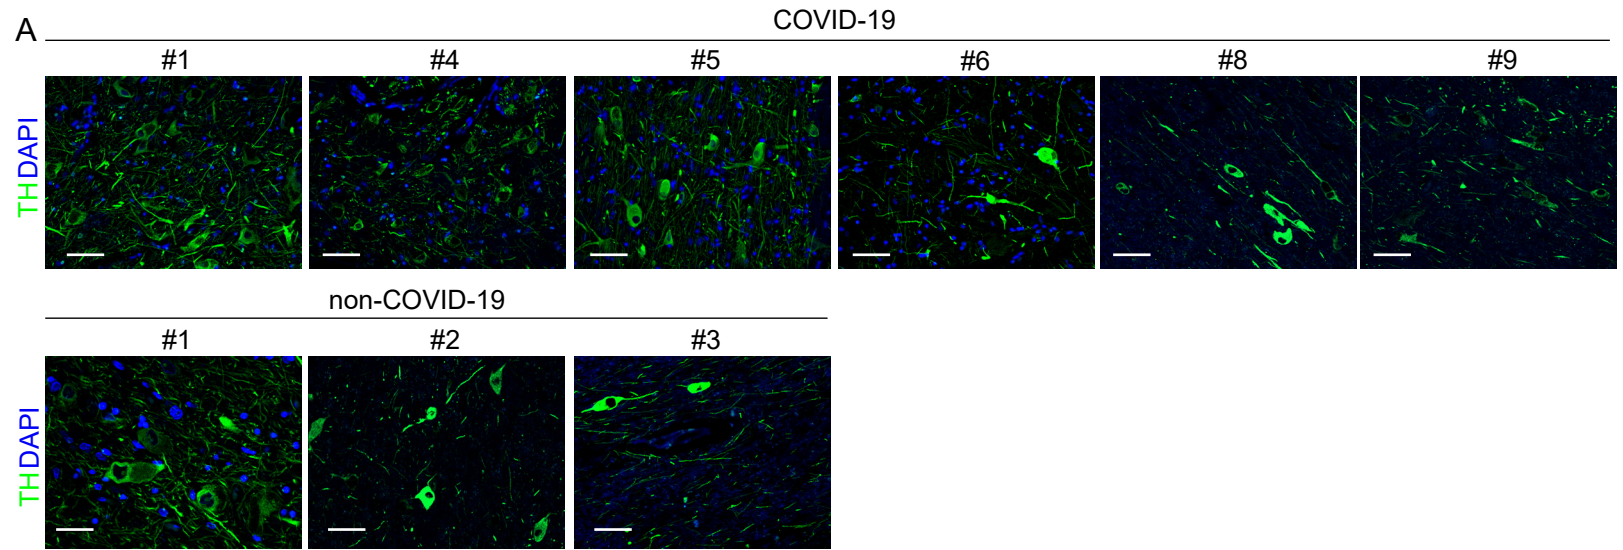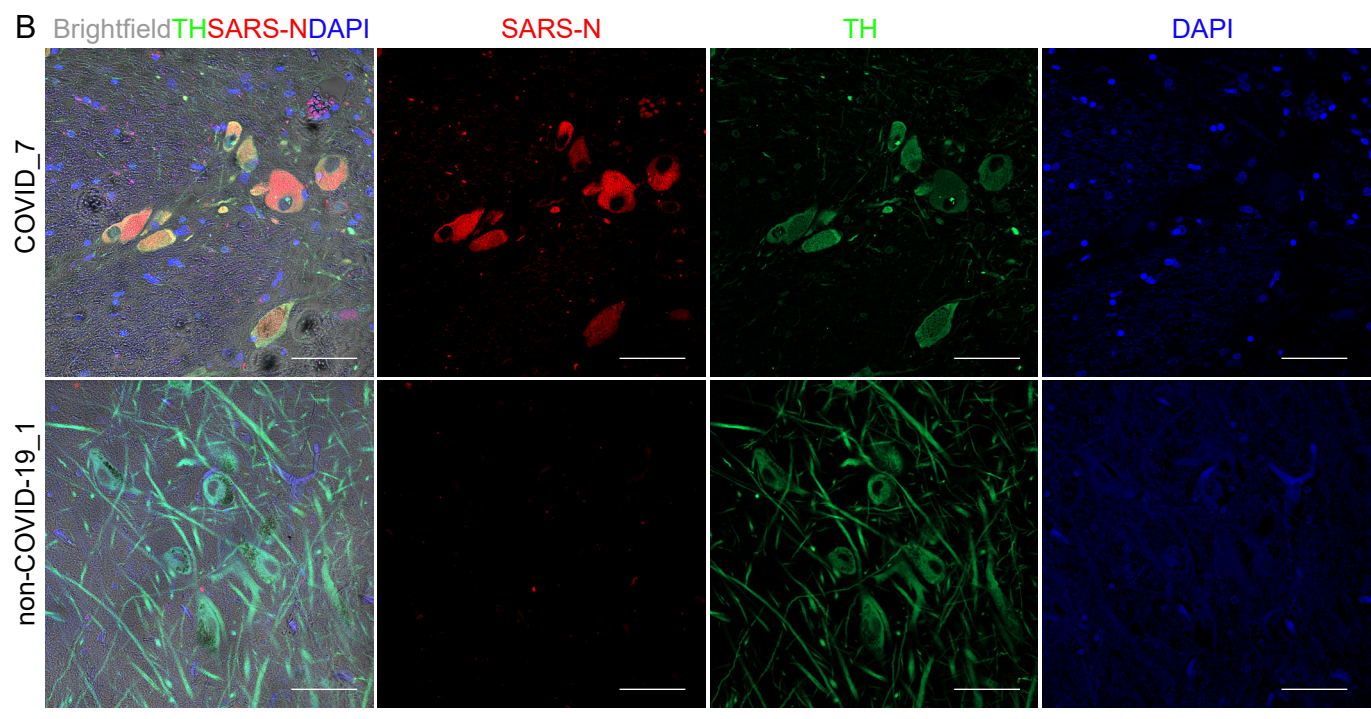

**Figure S7. Inflammatory and senescence phenotypes were detected in autopsy substantia nigra samples of COVID-19 patients. Related to Figure 7.**

**(A)** Representative confocal images of TH staining in the autopsy substantia nigra sections of COVID-19 patients versus non-COVID-19 patients. (Cohort 1: N=6 COVID-19 patients; N=3 non-COVID-19 patients). Scale bar=50 $\mu$ m.

**(B)** Representative confocal images of SARS-N and TH staining in the autopsy substantia nigra sections of COVID-19 patient versus non-COVID-19 patient. (Cohort 2: N=1 COVID-19 patients; N=1 non-COVID-19 patients). Scale bar=50 $\mu$ m.

**Table S1. Demographics and pathological characterization of control autopsy cohort. Related to Figure 7 and Figure S7.**

**Table S2. Demographics and pathological characterization of COVID-19 autopsy cohort. Related to Figure 7 and Figure S7.**

**Table S3. Demographics and pathological characterization of PD(D) autopsy cohort. Related to Figure 7 and Figure S7.**

**Table S4. Patient information. Related to Figure 7 and Figure S7.**

|             | <b>Patient ID</b> | <b>Gender</b> | <b>Age</b> | <b>Experiments</b>               | <b>Source</b>       |
|-------------|-------------------|---------------|------------|----------------------------------|---------------------|
| Cohort 1    | COVID_1           | Male          | 66         | Fig. 7A-7E and Fig. S7A          | Columbia University |
|             | COVID_4           | Female        | 78         | Fig. 7A-7E and Fig. S7A          | Columbia University |
|             | COVID_5           | Female        | 80         | Fig. 7A-7E and Fig. S7A          | Columbia University |
|             | COVID_6           | Male          | 80         | Fig. 7A-7E and Fig. S7A          | Columbia University |
|             | COVID_7           | Male          | 74         | Fig. S7B                         | The Netherlands     |
|             | COVID_8           | Male          | 67         | Fig. 7A-7E, Fig. 7F and Fig. S7A | The Netherlands     |
|             | COVID_9           | Male          | 59         | Fig. 7A-7E, Fig. 7F and Fig. S7A | The Netherlands     |
|             | non-COVID_1       | Male          | 72         | Fig. 7A-7E, Fig. 7F and Fig. S7A | The Netherlands     |
|             | non-COVID_2       | Male          | 61         | Fig. 7A-7E, Fig. 7F and Fig. S7A | The Netherlands     |
|             | non-COVID_3       | Female        | 61         | Fig. 7A-7E and Fig. S7A          | Columbia University |
| non-COVID_4 | Male              | 82            | Fig. 7F    | The Netherlands                  |                     |
| Cohort 2    | -                 | -             | -          | Fig. 7G-7H and Table S1-S3       | The Netherlands     |



**Table S5. Antibodies used for immunocytochemistry, intracellular flow cytometry analysis and western blotting analysis. Related to STAR Methods.**

| Usage                                | Antibody                                             | Clone #     | Host    | Catalog #   | Vendor                   | Dilution |
|--------------------------------------|------------------------------------------------------|-------------|---------|-------------|--------------------------|----------|
| Immunocytochemistry                  | Anti-SARS-CoV/SARS-CoV-2 Nucleocapsid                | 001         | Rabbit  | 40143-R001  | Sino Biological          | 1:500    |
| Immunocytochemistry                  | ACE2                                                 | Polyclonal  | Rabbit  | ab15348     | Abcam                    | 1:500    |
| Immunocytochemistry                  | Firefly luciferase Monoclonal Antibody (CS 17)       | CS 17       | Mouse   | 35-6700     | Thermo Fisher Scientific | 1:200    |
| Immunocytochemistry and western blot | Anti-Alpha Synuclein                                 | Syn211      | Mouse   | S5566-100UL | Millipore                | 1:250    |
| Immunocytochemistry                  | Anti-MAP2 antibody                                   | Polyclonal  | Chicken | ab5392      | Abcam                    | 1:5000   |
| Western blot                         | p21 Waf1/Cip1 (12D1) Rabbit mAb                      | 12D1        | Rabbit  | 2947        | Cell Signaling           | 1:500    |
| Western blot                         | Human Lamin B1 Antibody                              | 919007      | Mouse   | MAB8525     | R&D Systems              | 1:250    |
| Immunocytochemistry                  | anti- $\alpha$ -Synuclein Phospho                    | P-syn/81A   | Mouse   | MMS-5091    | Biolegend                | 1:1000   |
| Immunocytochemistry                  | Goat polyclonal anti-FOXA2                           | Polyclonal  | Goat    | AF2400      | R&D Systems              | 1:250    |
| Immunocytochemistry                  | Recombinant Anti-TBR1 antibody                       | EPR8138 (2) | Rabbit  | ab183032    | Abcam                    | 1:100    |
| Immunocytochemistry                  | Anti-Ctip2 antibody                                  | 25B6        | Rat     | ab18465     | Abcam                    | 1:500    |
| Immunocytochemistry                  | Anti-Tyrosine Hydroxylase antibody - Neuronal Marker | Polyclonal  | Rabbit  | ab112       | Abcam                    | 1:500    |

|                     |                                                                                |            |         |             |                             |        |
|---------------------|--------------------------------------------------------------------------------|------------|---------|-------------|-----------------------------|--------|
| Immunocytochemistry | Human/Mouse Tyrosine Hydroxylase Antibody                                      | 779427     | Mouse   | MAB7566     | R&D Systems                 | 1:200  |
| Immunocytochemistry | Anti-FOXA2 Antibody                                                            | M-20       | Goat    | sc-6554     | Santa Cruz                  | 1:150  |
| Immunocytochemistry | Anti-GFP antibody                                                              | Polyclonal | Chicken | ab13970     | Abcam                       | 1:1000 |
| Immunocytochemistry | Rabbit polyclonal anti-LMX-1                                                   | Polyclonal | Rabbit  | AB10533     | Millipore                   | 1:1000 |
| Immunocytochemistry | Donkey anti-Mouse IgG (H+L) Cross-Adsorbed Secondary Antibody, Alexa Fluor 488 | Polyclonal | Donkey  | A-21202     | Thermo Fisher Scientific    | 1:500  |
| Immunocytochemistry | Donkey anti-Rabbit IgG (H+L) Secondary Antibody, Alexa Fluor 594               | Polyclonal | Donkey  | A-21207     | Thermo Fisher Scientific    | 1:500  |
| Immunocytochemistry | Donkey anti-Mouse IgG (H+L) Secondary Antibody, Alexa Fluor 594 conjugate      | Polyclonal | Donkey  | A-21203     | Thermo Fisher Scientific    | 1:500  |
| Immunocytochemistry | Donkey anti-Mouse IgG (H+L) Secondary Antibody, Alexa Fluor 647                | Polyclonal | Donkey  | A-31571     | Thermo Fisher Scientific    | 1:500  |
| Immunocytochemistry | Alexa Fluor 488 AffiniPure Donkey Anti-Chicken IgY (IgG) (H+L)                 | Polyclonal | Donkey  | 703-545-155 | Jackson ImmunoResearch Labs | 1:500  |
| Immunocytochemistry | Donkey anti-Goat IgG (H+L) Cross-Adsorbed                                      | Polyclonal | Donkey  | A-21447     | Thermo Fisher               | 1:500  |

|                     |                                                            |            |        |        |               |       |
|---------------------|------------------------------------------------------------|------------|--------|--------|---------------|-------|
|                     | Secondary Antibody, Alexa Fluor 647                        |            |        |        | Scientific    |       |
| Immunocytochemistry | Donkey anti-Goat IgG Secondary Antibody, Alexa Fluor 555   | Polyclonal | Donkey | A32816 | Thermo Fisher | 1:500 |
| Immunocytochemistry | Donkey anti-Rabbit IgG Secondary Antibody, Alexa Fluor 647 | Polyclonal | Donkey | A32795 | Thermo Fisher | 1:500 |

**Table S6. Primers used for RT-qPCR. Related to STAR Methods.**

| Primer name             | Sequence                             |
|-------------------------|--------------------------------------|
| <i>ACTB-Forward</i>     | <i>CGTCACCAACTGGGACGACA</i>          |
| <i>ACTB-Reverse</i>     | <i>CTTCTCGCGGTTGGCCTTGG</i>          |
| <i>SARS-CoV-2-TRS-L</i> | <i>CTCTTG TAGATCTGTTCTCTAAACGAAC</i> |
| <i>SARS-CoV-2-TRS-N</i> | <i>GGTCCACCAAACGTAATGCG</i>          |
| <i>LaminB1-F</i>        | <i>AAGCATGAAACGCGCTTGG</i>           |
| <i>LaminB1-R</i>        | <i>AGTTTGGCATGGTAAGTCTGC</i>         |
| <i>IGFBP7-F</i>         | <i>ATCCCGACACCTGTCCTCAT</i>          |
| <i>IGFBP7-R</i>         | <i>CCCAGCCAGT TACTTCATGCT</i>        |

#### Reference

1. Riessland, M., Kolisnyk, B., Kim, T.W., Cheng, J., Ni, J., Pearson, J.A., Park, E.J., Dam, K., Acehan, D., Ramos-Espiritu, L.S., et al. (2019). Loss of SATB1 Induces p21-Dependent Cellular Senescence in Post-mitotic Dopaminergic Neurons. *Cell Stem Cell* 25, 514-530 e518. 10.1016/j.stem.2019.08.013.
